# Supplementary material for: From expression pattern to genetic association in asthma and asthma-related phenotypes
Source: PubMed Central journal article supplement (PMC3532380; doi:10.1186/1756-0500-5-630), 2012-11-13
Supplement: 1756-0500-5-630-S1.pdf [file 1756-0500-5-630-S1.pdf]

**Additional table 1: Association before correction with asthma related phenotypes**

| Gene                                        | Number of tested SNP | Corrected threshold | SNP                                    | Allele | AF     | Number of families | Z      | p value |        |               |        |  |  |
|---------------------------------------------|----------------------|---------------------|----------------------------------------|--------|--------|--------------------|--------|---------|--------|---------------|--------|--|--|
|                                             |                      |                     |                                        |        |        |                    |        | Asthma  | Atopy  | Atopic asthma |        |  |  |
| <b>Group 1: Immune signalling molecules</b> |                      |                     |                                        |        |        |                    |        |         |        |               |        |  |  |
| <i>CD19</i>                                 | 28                   | 0.0025              | 4788114                                | T      | 7.3    | 55                 | -2.155 | 0.0312  |        |               |        |  |  |
|                                             |                      |                     |                                        | C      | 92.7   |                    | 2.155  |         |        |               |        |  |  |
|                                             |                      |                     | 9937676                                | G      | 37.7   | 110                | -2.635 |         | 0.0084 |               |        |  |  |
|                                             |                      |                     |                                        | A      | 62.3   |                    | 2.635  |         |        |               |        |  |  |
|                                             |                      |                     | 111506775                              | A      | 34.6   | 117                | -1.920 | 0.0190  |        |               |        |  |  |
|                                             |                      |                     |                                        | G      | 65.4   |                    | 1.920  |         |        |               |        |  |  |
|                                             |                      |                     | 3922668                                | A      | 37.6   | 111                | -2.697 |         | 0.0070 |               |        |  |  |
|                                             |                      |                     |                                        | G      | 62.4   |                    | 2.697  |         |        |               |        |  |  |
|                                             |                      |                     | 8045276                                | T      | 26.5   | 89                 | 1.974  |         | 0.0483 |               |        |  |  |
|                                             |                      |                     |                                        | A      | 73.5   |                    | -1.974 |         |        |               |        |  |  |
|                                             |                      |                     | <b>Group 2: Extracellular proteins</b> |        |        |                    |        |         |        |               |        |  |  |
|                                             |                      |                     | <i>COL11A1</i>                         | 53     | 0.0011 | 1676486            | A      | 20.6    | 107    | 2.192         | 0.0283 |  |  |
| G                                           | 79.4                 | -2.192              |                                        |        |        |                    |        |         |        |               |        |  |  |
|                                             | A                    | 20.6                |                                        |        |        | 87                 | 2.091  |         | 0.0365 |               |        |  |  |
|                                             | G                    | 79.4                |                                        |        |        |                    | -2.091 |         |        |               |        |  |  |
| 1241163                                     | A                    | 23.1                |                                        |        |        | 116                | 1.985  | 0.0471  |        |               |        |  |  |
|                                             | C                    | 76.9                |                                        |        |        |                    | -1.985 |         |        |               |        |  |  |
| 1085                                        | A                    | 23                  |                                        |        |        | 115                | 2.059  | 0.0395  |        |               |        |  |  |
|                                             | C                    | 77                  |                                        |        |        |                    | -2.059 |         |        |               |        |  |  |
| 1463039                                     | T                    | 6.8                 |                                        |        |        | 44                 | 2.712  | 0.0067  |        |               |        |  |  |
|                                             | C                    | 93.2                |                                        |        |        |                    | -2.712 |         |        |               |        |  |  |
|                                             |                      | T                   |                                        |        |        | 6.8                | 43     | -2.462  |        | 0.0138        |        |  |  |
|                                             |                      | C                   |                                        |        |        | 93.2               |        | 2.462   |        |               |        |  |  |
| 1415363                                     | A                    | 20.7                |                                        |        |        | 110                | 2.360  | 0.0183  |        |               |        |  |  |
|                                             | G                    | 79.3                |                                        |        |        |                    | -2.360 |         |        |               |        |  |  |
|                                             |                      | A                   |                                        |        |        | 20.7               | 85     | 2.172   |        | 0.0299        |        |  |  |
|                                             |                      | G                   |                                        |        |        | 79.3               |        | -2.172  |        |               |        |  |  |
| 7544816                                     | A                    | 5.3                 |                                        |        |        | 35                 | -1.964 | 0.0495  |        |               |        |  |  |
|                                             | C                    | 94.7                |                                        |        |        |                    | 1.964  |         |        |               |        |  |  |
| 10493986                                    | C                    | 27                  |                                        |        |        | 121                | 2.031  | 0.0422  |        |               |        |  |  |
|                                             | T                    | 73                  |                                        |        |        |                    | -2.031 |         |        |               |        |  |  |
|                                             |                      | C                   | 27                                     | 97     | 2.127  |                    | 0.0334 |         |        |               |        |  |  |
|                                             |                      | T                   | 73                                     |        | -2.127 |                    |        |         |        |               |        |  |  |
| 4338381                                     | G                    | 30.8                | 124                                    | 2.050  | 0.0404 |                    |        |         |        |               |        |  |  |
|                                             | A                    | 69.2                |                                        | -2.050 |        |                    |        |         |        |               |        |  |  |
| 7543626                                     | G                    | 17.4                | 103                                    | -2.376 | 0.0175 |                    |        |         |        |               |        |  |  |
|                                             | A                    | 82.6                |                                        | 2.376  |        |                    |        |         |        |               |        |  |  |
|                                             |                      | G                   | 17.4                                   | 92     | -1.960 |                    | 0.0500 |         |        |               |        |  |  |
|                                             |                      | A                   | 82.6                                   |        | 1.960  |                    |        |         |        |               |        |  |  |

| Gene          | Number of tested SNP | Corrected threshold | SNP      | Allele | AF     | Number of families | Z      | p value |       |               |
|---------------|----------------------|---------------------|----------|--------|--------|--------------------|--------|---------|-------|---------------|
|               |                      |                     |          |        |        |                    |        | Asthma  | Atopy | Atopic asthma |
| <i>MUC2</i>   | 13                   | 0.0030              | 7103978  | G      | 7.1    | 39                 | -1.987 |         |       | 0.0469        |
|               |                      |                     |          | A      | 92.9   |                    | 1.987  |         |       |               |
| <i>COL2A1</i> | 24                   | 0.0020              | 4760607  | G      | 10.4   | 44                 | 2.168  | 0.0302  |       |               |
|               |                      |                     |          | T      | 89.6   |                    | -2.168 |         |       |               |
|               |                      |                     | 917055   | A      | 15.1   | 95                 | 2.072  | 0.0382  |       |               |
|               |                      |                     |          | G      | 84.9   |                    | -2.072 |         |       |               |
|               |                      |                     | 1034762  | A      | 16.9   | 105                | 2.164  | 0.0300  |       |               |
|               |                      |                     |          | C      | 83.1   |                    | -2.164 |         |       |               |
|               |                      |                     | 6580647  | A      | 19.1   | 110                | 2.724  | 0.0064  |       |               |
|               |                      |                     |          | C      | 80.9   |                    | -2.724 |         |       |               |
|               |                      |                     | 7305954  | C      | 19.2   | 111                | 2.649  | 0.0081  |       |               |
|               |                      |                     |          | T      | 80.8   |                    | -2.649 |         |       |               |
|               |                      |                     | 12439075 | T      | 33.1   | 121                | 2.161  | 0.0307  |       |               |
|               |                      |                     |          | C      | 66.9   |                    | -2.161 |         |       |               |
| 11073813      | G                    | 33.3                | 120      | 2.108  | 0.0350 |                    |        |         |       |               |
|               | A                    | 66.7                |          | 2.108  |        |                    |        |         |       |               |
| 11630178      | C                    | 33.5                | 99       | 2.695  | 0.0070 |                    |        |         |       |               |
|               | T                    | 66.5                |          | -2.695 |        |                    |        |         |       |               |
|               | C                    | 33.5                | 82       | 3.589  | 0.0003 |                    |        |         |       |               |
|               | T                    | 66.5                |          | -3.589 |        |                    |        |         |       |               |
|               | C                    | 33.5                | 85       | 3.900  | 0.0001 |                    |        |         |       |               |
|               | T                    | 66.5                |          | -3.900 |        |                    |        |         |       |               |
| 938605        | G                    | 17.6                | 101      | -2.203 | 0.0276 |                    |        |         |       |               |
|               | A                    | 82.4                |          | 2.203  |        |                    |        |         |       |               |
|               | G                    | 17.6                | 84       | -2.086 | 0.0370 |                    |        |         |       |               |
|               | A                    | 82.4                |          | 2.086  |        |                    |        |         |       |               |
| 11632435      | G                    | 12.9                | 75       | -2.254 | 0.0242 |                    |        |         |       |               |
|               | A                    | 87.1                |          | 2.254  |        |                    |        |         |       |               |
| 8031532       | G                    | 16.8                | 82       | -2.458 | 0.0140 |                    |        |         |       |               |
|               | T                    | 83.2                |          | 2.458  |        |                    |        |         |       |               |
| 12905452      | A                    | 27.9                | 95       | 2.635  | 0.0084 |                    |        |         |       |               |
|               | C                    | 72.1                |          | -2.635 |        |                    |        |         |       |               |
|               | A                    | 27.9                | 100      | 2.745  | 0.0061 |                    |        |         |       |               |
|               | C                    | 72.1                |          | -2.745 |        |                    |        |         |       |               |
| 7180356       | T                    | 29.9                | 95       | -2.166 | 0.0303 |                    |        |         |       |               |
|               | C                    | 70.1                |          | 2.166  |        |                    |        |         |       |               |
|               | T                    | 29.9                | 100      | 2.134  | 0.0328 |                    |        |         |       |               |
|               | C                    | 70.1                |          | -2.134 |        |                    |        |         |       |               |
| 4932432       | C                    | 31.6                | 106      | 2.095  | 0.0361 |                    |        |         |       |               |
|               | A                    | 68.4                |          | -2.095 |        |                    |        |         |       |               |
|               | C                    | 31.6                | 197      | 2.690  | 0.0071 |                    |        |         |       |               |
|               | A                    | 68.4                |          | -2.690 |        |                    |        |         |       |               |

| Gene                            | Number of tested SNP | Corrected threshold | SNP     | Allele  | AF     | Number of families | Z      | p value |       |               |        |        |        |        |        |
|---------------------------------|----------------------|---------------------|---------|---------|--------|--------------------|--------|---------|-------|---------------|--------|--------|--------|--------|--------|
|                                 |                      |                     |         |         |        |                    |        | Asthma  | Atopy | Atopic asthma |        |        |        |        |        |
| <i>AGCI</i>                     | 32                   | 0.0012              | 938613  | A       | 33.5   | 109                | 2.154  | 0.0312  |       |               |        |        |        |        |        |
|                                 |                      |                     |         | G       | 66.5   |                    | -2.154 |         |       |               |        |        |        |        |        |
|                                 |                      |                     |         | A       | 33.5   | 110                | 2.570  |         |       |               | 0.0102 |        |        |        |        |
|                                 |                      |                     |         | G       | 66.5   |                    | -2.570 |         |       |               |        |        |        |        |        |
| <i>FBLNI</i>                    | 30                   | 0.0011              | 3810631 | T       | 36.4   | 134                | -1.962 | 0.0498  |       |               |        |        |        |        |        |
|                                 |                      |                     |         | C       | 63.6   |                    | 1.962  |         |       |               |        |        |        |        |        |
|                                 |                      |                     | 5765475 | C       | 42.5   | 115                | 2.144  |         |       |               | 0.0321 |        |        |        |        |
|                                 |                      |                     |         | T       | 57.5   |                    | -2.144 |         |       |               |        |        |        |        |        |
|                                 |                      |                     | 2051616 | G       | 40.6   | 107                | 2.182  |         |       |               |        | 0.0291 |        |        |        |
|                                 |                      |                     |         | A       | 59.4   |                    | -2.182 |         |       |               |        |        |        |        |        |
| <b>Group 3: Immune response</b> |                      |                     |         |         |        |                    |        |         |       |               |        |        |        |        |        |
| <i>HLA-DPBI</i>                 | 24                   | 0.0028              | 1431403 | C       | 35.6   | 144                | -2.043 | 0.0411  |       |               |        |        |        |        |        |
|                                 |                      |                     |         | T       | 64.4   |                    | 2.043  |         |       |               |        |        |        |        |        |
|                                 |                      |                     | 9277357 | G       | 36.2   | 138                | -2.609 |         |       |               | 0.0091 |        |        |        |        |
|                                 |                      |                     |         | A       | 63.8   |                    | 2.609  |         |       |               |        |        |        |        |        |
|                                 |                      |                     |         | G       | 36.2   | 111                | -2.500 |         |       |               |        | 0.0124 |        |        |        |
|                                 |                      |                     |         | A       | 63.8   |                    | 2.500  |         |       |               |        |        |        |        |        |
|                                 |                      |                     | 9277396 | A       | 37.7   | 143                | -2.680 |         |       |               | 0.0074 |        |        |        |        |
|                                 |                      |                     |         | G       | 62.3   |                    | 2.680  |         |       |               |        |        |        |        |        |
|                                 |                      |                     |         | A       | 37.7   | 124                | -2.199 |         |       |               |        | 0.0279 |        |        |        |
|                                 |                      |                     |         | G       | 62.3   |                    | 2.199  |         |       |               |        |        |        |        |        |
|                                 |                      |                     |         | A       | 37.7   | 114                | -2.733 |         |       |               |        |        | 0.0063 |        |        |
|                                 |                      |                     |         | G       | 62.3   |                    | 2.733  |         |       |               |        |        |        |        |        |
|                                 |                      |                     | 9277464 | T       | 34.9   | 139                | -2.530 |         |       |               | 0.0114 |        |        |        |        |
|                                 |                      |                     |         | C       | 65.1   |                    | 2.530  |         |       |               |        |        |        |        |        |
|                                 |                      |                     |         | T       | 34.9   | 119                | -2.014 |         |       |               |        | 0.0440 |        |        |        |
|                                 |                      |                     |         | C       | 65.1   |                    | 2.014  |         |       |               |        |        |        |        |        |
|                                 |                      |                     |         | T       | 34.9   | 111                | -2.553 |         |       |               |        |        | 0.0107 |        |        |
|                                 |                      |                     |         | C       | 65.1   |                    | 2.553  |         |       |               |        |        |        |        |        |
|                                 |                      |                     |         | 9277535 | G      | 34.9               | 138    |         |       |               |        |        |        | -2.591 | 0.0096 |
|                                 |                      |                     |         |         | A      | 65.1               |        |         |       |               |        |        |        | 2.591  |        |
| G                               | 34.9                 | 118                 |         |         | -2.083 | 0.0372             |        |         |       |               |        |        |        |        |        |
| A                               | 65.1                 |                     |         |         | 2.083  |                    |        |         |       |               |        |        |        |        |        |
| G                               | 34.9                 | 110                 | -2.628  |         | 0.0086 |                    |        |         |       |               |        |        |        |        |        |
| A                               | 65.1                 |                     | 2.268   |         |        |                    |        |         |       |               |        |        |        |        |        |
| 9277554                         | T                    | 37.6                | 142     | -2.869  |        |                    | 0.0041 |         |       |               |        |        |        |        |        |
|                                 | C                    | 62.4                |         | 2.869   |        |                    |        |         |       |               |        |        |        |        |        |
|                                 | T                    | 37.6                | 125     | -2.256  |        | 0.0241             |        |         |       |               |        |        |        |        |        |
|                                 | C                    | 62.4                |         | 2.256   |        |                    |        |         |       |               |        |        |        |        |        |
|                                 | T                    | 37.6                | 114     | -2.649  | 0.0081 |                    |        |         |       |               |        |        |        |        |        |
|                                 | C                    | 62.4                |         | 2.649   |        |                    |        |         |       |               |        |        |        |        |        |

| Gene            | Number of tested SNP | Corrected threshold | SNP      | Allele | AF     | Number of families | Z      | p value |       |               |        |
|-----------------|----------------------|---------------------|----------|--------|--------|--------------------|--------|---------|-------|---------------|--------|
|                 |                      |                     |          |        |        |                    |        | Asthma  | Atopy | Atopic asthma |        |
| <i>HLA-DPBI</i> | 24                   | 0.0028              | 9277555  | A      | 30.5   | 128                | -2.501 | 0.0124  |       |               |        |
|                 |                      |                     |          | G      | 69.5   |                    | 2.501  |         |       |               |        |
|                 |                      |                     |          | A      | 30.5   | 113                | -2.539 |         |       |               | 0.0111 |
|                 |                      |                     |          | G      | 69.5   |                    | 2.539  |         |       |               |        |
|                 |                      |                     |          | A      | 30.5   | 102                | -2.660 |         |       |               | 0.0078 |
|                 |                      |                     |          | G      | 69.5   |                    | 2.660  |         |       |               |        |
|                 |                      |                     | 9277565  | T      | 27.8   | 124                | -2.588 | 0.0096  |       |               |        |
|                 |                      |                     |          | C      | 72.2   |                    | 2.588  |         |       |               |        |
|                 |                      |                     |          | T      | 27.8   | 108                | -2.433 | 0.0150  |       |               |        |
|                 |                      |                     |          | C      | 72.2   |                    | 2.433  |         |       |               |        |
|                 |                      |                     |          | T      | 27.8   | 99                 | -2.673 | 0.0075  |       |               |        |
|                 |                      |                     |          | C      | 72.2   |                    | 2.673  |         |       |               |        |
|                 |                      |                     | 10484569 | A      | 9.7    | 65                 | -2.225 | 0.0261  |       |               |        |
|                 |                      |                     |          | G      | 90.3   |                    | 2.225  |         |       |               |        |
|                 |                      |                     |          | A      | 9.7    | 59                 | -2.714 | 0.0067  |       |               |        |
|                 |                      |                     |          | G      | 90.3   |                    | 2.714  |         |       |               |        |
|                 |                      |                     |          | A      | 9.7    | 52                 | -2.390 | 0.0168  |       |               |        |
|                 |                      |                     |          | G      | 90.3   |                    | 2.390  |         |       |               |        |
|                 |                      |                     | 3128917  | G      | 30.5   | 128                | -2.501 | 0.0124  |       |               |        |
|                 |                      |                     |          | T      | 69.5   |                    | 2.501  |         |       |               |        |
|                 |                      |                     |          | G      | 30.5   | 113                | -2.539 | 0.0111  |       |               |        |
|                 |                      |                     |          | T      | 69.5   |                    | 2.539  |         |       |               |        |
|                 |                      |                     |          | G      | 30.5   | 102                | -2.660 | 0.0078  |       |               |        |
|                 |                      |                     |          | T      | 69.5   |                    | 2.660  |         |       |               |        |
| 2281388         | A                    | 6.4                 | 46       | -2.255 | 0.0241 |                    |        |         |       |               |        |
|                 | G                    | 93.6                |          | 2.255  |        |                    |        |         |       |               |        |
| 3117222         | T                    | 30.5                | 127      | -2.400 | 0.0164 |                    |        |         |       |               |        |
|                 | C                    | 69.5                |          | 2.400  |        |                    |        |         |       |               |        |
|                 | T                    | 30.5                | 112      | -2.427 | 0.0152 |                    |        |         |       |               |        |
|                 | C                    | 69.5                |          | 2.427  |        |                    |        |         |       |               |        |
|                 | T                    | 30.5                | 102      | -2.660 | 0.0078 |                    |        |         |       |               |        |
|                 | C                    | 69.5                |          | 2.660  |        |                    |        |         |       |               |        |
| 3117221         | T                    | 27.8                | 124      | -2.468 | 0.0136 |                    |        |         |       |               |        |
|                 | C                    | 72.2                |          | 2.468  |        |                    |        |         |       |               |        |
|                 | T                    | 27.8                | 107      | -2.369 | 0.0178 |                    |        |         |       |               |        |
|                 | C                    | 72.2                |          | 2.369  |        |                    |        |         |       |               |        |
|                 | T                    | 27.8                | 99       | -2.619 | 0.0088 |                    |        |         |       |               |        |
|                 | C                    | 72.2                |          | 2.619  |        |                    |        |         |       |               |        |
| 6914651         | G                    | 31.6                | 111      | -2.305 | 0.0212 |                    |        |         |       |               |        |
|                 | A                    | 68.4                |          | 2.305  |        |                    |        |         |       |               |        |
|                 | G                    | 31.6                | 102      | -2.955 | 0.0031 |                    |        |         |       |               |        |
|                 | A                    | 68.4                |          | 2.955  |        |                    |        |         |       |               |        |
|                 | G                    | 31.6                | 92       | -2.863 | 0.0042 |                    |        |         |       |               |        |
|                 | A                    | 68.4                |          | 2.863  |        |                    |        |         |       |               |        |

| Gene           | Number of tested SNP | Corrected threshold | SNP      | Allele | AF     | Number of families | Z      | p value |       |               |        |        |        |        |        |
|----------------|----------------------|---------------------|----------|--------|--------|--------------------|--------|---------|-------|---------------|--------|--------|--------|--------|--------|
|                |                      |                     |          |        |        |                    |        | Asthma  | Atopy | Atopic asthma |        |        |        |        |        |
| <i>MS4A1</i>   | 27                   | 0.0037              | 11230335 | A      | 8.9    | 60                 | 2.828  | 0.0047  |       |               |        |        |        |        |        |
|                |                      |                     |          | C      | 91.1   |                    | -2.282 |         |       |               |        |        |        |        |        |
| <i>CEACAM5</i> | 9                    | 0.0050              | 7257798  | C      | 23     | 117                | 2.042  | 0.0412  |       |               |        |        |        |        |        |
|                |                      |                     |          | A      | 77     |                    | -2.042 |         |       |               |        |        |        |        |        |
| <i>IGHG1</i>   | 39                   | 0.0028              | 2040459  | A      | 11.8   | 73                 | 2.034  | 0.0420  |       |               |        |        |        |        |        |
|                |                      |                     |          | C      | 88.2   |                    | -2.034 |         |       |               |        |        |        |        |        |
|                |                      |                     | 2105992  | A      | 18.4   | 96                 | 2.334  | 0.0196  |       |               |        |        |        |        |        |
|                |                      |                     |          | G      | 81.6   |                    | -2.334 |         |       |               |        |        |        |        |        |
|                |                      |                     |          | A      | 18.4   |                    | 81     |         |       |               |        |        |        | 1.993  | 0.0463 |
|                |                      |                     |          | G      | 81.6   |                    |        |         |       |               |        |        |        | -1.993 |        |
|                |                      | 17112712            | A        | 18.4   | 79     | 2.433              |        |         |       |               |        | 0.0150 |        |        |        |
|                |                      |                     | G        | 81.6   |        | -2.433             |        |         |       |               |        |        |        |        |        |
|                |                      | 1544317             | A        | 29.8   | 94     | 2.440              | 0.0147 |         |       |               |        |        |        |        |        |
|                |                      |                     | G        | 70.2   |        | -2.440             |        |         |       |               |        |        |        |        |        |
|                |                      |                     | A        | 29.8   |        | 95                 |        |         |       |               |        |        | 2.219  | 0.0265 |        |
|                |                      |                     | G        | 70.2   |        |                    |        |         |       |               |        |        | -2.219 |        |        |
| 5760189        | G                    | 30.4                | 99       | 2.376  | 0.0175 |                    |        |         |       |               |        |        |        |        |        |
|                | A                    | 69.6                |          | -2.376 |        |                    |        |         |       |               |        |        |        |        |        |
|                | G                    | 30.4                |          | 98     |        |                    |        |         |       |               | 2.134  | 0.0328 |        |        |        |
|                | A                    | 69.6                |          |        |        |                    |        |         |       |               | -2.134 |        |        |        |        |
| <i>IGL@</i>    | 74                   | 0.0012              | 5760189  | T      | 27.2   | 114                | 2.194  | 0.0282  |       |               |        |        |        |        |        |
|                |                      |                     |          | C      | 72.8   |                    | -2.194 |         |       |               |        |        |        |        |        |
|                |                      |                     | 2001106  | T      | 27.2   | 103                | 2.204  | 0.0275  |       |               |        |        |        |        |        |
|                |                      |                     |          | C      | 72.8   |                    | -2.204 |         |       |               |        |        |        |        |        |
|                |                      |                     |          | T      | 27.2   |                    | 96     |         |       |               |        |        |        | 2.691  | 0.0071 |
|                |                      |                     |          | C      | 72.8   |                    |        |         |       |               |        |        |        | -2.691 |        |
|                |                      |                     | 3788368  | C      | 8.8    | 58                 | -2.224 | 0.0262  |       |               |        |        |        |        |        |
|                |                      |                     |          | T      | 91.2   |                    | 2.224  |         |       |               |        |        |        |        |        |
|                |                      |                     |          | C      | 8.8    |                    | 49     |         |       |               |        |        |        | -2.066 | 0.0389 |
|                |                      |                     |          | T      | 91.2   |                    |        |         |       |               |        |        |        | 2.066  |        |
| 3788368        | C                    | 10.4                | 58       | -2.061 | 0.0393 |                    |        |         |       |               |        |        |        |        |        |
|                | T                    | 89.6                |          | 2.061  |        |                    |        |         |       |               |        |        |        |        |        |

| Gene                                     | Number of tested SNP | Corrected threshold | SNP      | Allele | AF     | Number of families | Z      | p value       |        |               |        |
|------------------------------------------|----------------------|---------------------|----------|--------|--------|--------------------|--------|---------------|--------|---------------|--------|
|                                          |                      |                     |          |        |        |                    |        | Asthma        | Atopy  | Atopic asthma |        |
| <b>Group 4: Intracellular signalling</b> |                      |                     |          |        |        |                    |        |               |        |               |        |
| <i>PTPRC</i>                             | 35                   | 0.0012              | 1052238  | T      | 47.9   | 135                | -2.230 | 0.0257        |        |               |        |
|                                          |                      |                     |          | C      | 52.1   |                    | 2.230  |               |        |               |        |
|                                          |                      |                     |          | T      | 47.9   | 117                | -2.384 |               |        |               | 0.0171 |
|                                          |                      |                     |          | C      | 52.1   |                    | 2.384  |               |        |               |        |
|                                          |                      |                     | T        | 47.9   | 115    | -2.333             | 0.0196 |               |        |               |        |
|                                          |                      |                     | C        | 52.1   |        | 2.333              |        |               |        |               |        |
|                                          |                      |                     | 7522020  | T      | 34.3   | 131                |        | 2.055         | 0.0399 |               |        |
|                                          |                      |                     |          | G      | 65.7   |                    |        | -2.055        |        |               |        |
|                                          |                      |                     |          | T      | 34.3   | 104                | 2.085  | 0.0371        |        |               |        |
|                                          |                      |                     |          | G      | 65.7   |                    | -2.085 |               |        |               |        |
|                                          |                      |                     | T        | 34.3   | 107    | 2.137              | 0.0326 |               |        |               |        |
|                                          |                      |                     | G        | 65.7   |        | -2.137             |        |               |        |               |        |
|                                          |                      |                     | 9803750  | T      | 32     | 118                |        | -2.863        | 0.0042 |               |        |
|                                          |                      |                     |          | C      | 68     |                    |        | 2.863         |        |               |        |
|                                          |                      |                     |          | T      | 32     | 108                | -3.034 | 0.0024        |        |               |        |
|                                          |                      |                     |          | C      | 68     |                    | 3.034  |               |        |               |        |
|                                          |                      |                     | T        | 32     | 99     | -2.880             | 0.0040 |               |        |               |        |
|                                          |                      |                     | C        | 68     |        | 2.880              |        |               |        |               |        |
|                                          |                      |                     | 2359952  | G      | 32.6   | 117                |        | -2.664        | 0.0077 |               |        |
|                                          |                      |                     |          | A      | 67.4   |                    |        | 2.664         |        |               |        |
| G                                        | 32.6                 | 106                 |          | -2.427 | 0.0151 |                    |        |               |        |               |        |
| A                                        | 67.4                 |                     |          | 2.427  |        |                    |        |               |        |               |        |
| G                                        | 32.6                 | 98                  | -2.710   | 0.0067 |        |                    |        |               |        |               |        |
| A                                        | 67.4                 |                     | 2.710    |        |        |                    |        |               |        |               |        |
| 3754098                                  | T                    | 8.4                 | 51       |        | -2.502 |                    |        |               |        |               |        |
|                                          | C                    | 91.6                |          |        | 2.502  |                    |        |               |        |               |        |
| 1932436                                  | G                    | 28.1                | 131      | -2.277 | 0.0228 |                    |        |               |        |               |        |
|                                          | A                    | 71.9                |          | 2.277  |        |                    |        |               |        |               |        |
| 14575169                                 | A                    | 34.4                | 107      | -2.064 | 0.0390 |                    |        |               |        |               |        |
|                                          | C                    | 65.6                |          | 2.064  |        |                    |        |               |        |               |        |
| 10919584                                 | A                    | 33.6                | 107      | -2.115 | 0.0344 |                    |        |               |        |               |        |
|                                          | G                    | 66.4                |          | 2.115  |        |                    |        |               |        |               |        |
| <i>GIP3</i>                              | 3                    | 0.0250              | 1247653  | G      | 43.4   | 133                | -2.353 | <b>0.0186</b> |        |               |        |
|                                          |                      |                     |          | A      | 56.6   |                    | 2.353  |               |        |               |        |
| <i>SYK</i>                               | 56                   | 0.0006              | 169724   | C      | 9      | 57                 | -2.043 | 0.0411        |        |               |        |
|                                          |                      |                     |          | T      | 91     |                    | 2.043  |               |        |               |        |
|                                          |                      |                     | 10993705 | T      | 7.3    | 103                | 2.086  |               | 0.0370 |               |        |
| G                                        | 92.7                 | -2.086              |          |        |        |                    |        |               |        |               |        |
| <b>Group 5: Proteolytic enzymes</b>      |                      |                     |          |        |        |                    |        |               |        |               |        |
| <i>CTSC</i>                              | 18                   | 0.0028              | 217111   | G      | 49.9   | 108                | 2.084  |               |        | 0.0372        |        |
|                                          |                      |                     |          | A      | 50.1   |                    | -2.084 |               |        |               |        |
| <i>PSMA6</i>                             | 5                    | 0.0063              | 10141237 | G      | 9.3    | 62                 | -1.975 | 0.0482        |        |               |        |
|                                          |                      |                     |          | A      | 90.7   |                    | 1.975  |               |        |               |        |

| Gene                                     | Number of tested SNP | Corrected threshold | SNP      | Allele   | AF     | Number of families | Z      | p value       |       |               |        |        |
|------------------------------------------|----------------------|---------------------|----------|----------|--------|--------------------|--------|---------------|-------|---------------|--------|--------|
|                                          |                      |                     |          |          |        |                    |        | Asthma        | Atopy | Atopic asthma |        |        |
| SPINK5                                   | 22                   | 0.0023              | 2287770  | G        | 6.6    | 41                 | 2.321  | 0.0203        |       |               |        |        |
|                                          |                      |                     |          | A        | 93.4   |                    | -2.321 |               |       |               |        |        |
|                                          |                      |                     | 2287769  | T        | 6.6    | 41                 | 2.321  |               |       |               |        |        |
|                                          |                      |                     |          | C        | 93.4   |                    | -2.321 |               |       |               |        |        |
| 6580523                                  | A                    | 87.3                | 84       | -2.169   | 0.0301 |                    |        |               |       |               |        |        |
|                                          | C                    | 12.7                |          | 2.169    |        |                    |        |               |       |               |        |        |
| <b>Group 6: Transmembrane proteins</b>   |                      |                     |          |          |        |                    |        |               |       |               |        |        |
| KLRC3                                    | 4                    | 0.0127              | 2734565  | C        | 25     | 125                | 1.975  | 0.0482        |       |               |        |        |
|                                          |                      |                     |          | T        | 75     |                    | -1.975 |               |       |               |        |        |
|                                          |                      |                     |          | C        | 25     | 109                | 2.166  |               |       |               | 0.0303 |        |
|                                          |                      |                     |          |          | T      |                    | 75     |               |       |               |        | -2.166 |
|                                          |                      |                     |          | 2617170  | T      | 25                 | 125    |               |       |               | 1.975  | 0.0482 |
|                                          |                      |                     |          |          | C      | 75                 |        |               |       |               | -1.975 |        |
| T                                        | 25                   | 108                 | 2.183    | 0.0290   |        |                    |        |               |       |               |        |        |
|                                          | C                    |                     | 75       |          | -2.183 |                    |        |               |       |               |        |        |
| ADRA2A                                   | 1                    | 0.0250              | 11195299 | A        | 6.3    | 56                 | -2.588 | <b>0.0097</b> |       |               |        |        |
|                                          |                      |                     |          | G        | 93.7   |                    | 2.588  |               |       |               |        |        |
| CLCA2                                    | 13                   | 0.0034              | 4912463  | A        | 25.8   | 114                | 2.405  | 0.0162        |       |               |        |        |
|                                          |                      |                     |          | C        | 74.2   |                    | -2.504 |               |       |               |        |        |
|                                          |                      |                     |          | A        | 25.8   | 108                | 2.801  |               |       |               | 0.0051 |        |
|                                          |                      |                     |          |          | C      |                    | 74.2   |               |       |               |        | -2.801 |
| KCNJ16                                   | 21                   | 0.0017              | 1990197  | G        | 46.4   | 139                | 2.019  | 0.0435        |       |               |        |        |
|                                          |                      |                     |          | A        | 53.6   |                    | -2.019 |               |       |               |        |        |
|                                          |                      |                     |          | G        | 46.4   | 117                | 2.078  |               |       |               | 0.0377 |        |
|                                          |                      |                     |          |          | A      |                    | 53.6   |               |       |               |        | -2.078 |
|                                          |                      |                     |          | 12943869 | G      | 31.1               | 110    |               |       |               | 2.018  | 0.0436 |
|                                          |                      |                     |          |          | A      | 68.9               |        |               |       |               | -2.018 |        |
| <b>Group 7: Free radical metabolism</b>  |                      |                     |          |          |        |                    |        |               |       |               |        |        |
| CYBA                                     | 5                    | 0.0054              | 899729   | A        | 50     | 126                | -1.990 | 0.0466        |       |               |        |        |
|                                          |                      |                     |          | C        | 50     |                    | 1.990  |               |       |               |        |        |
| <b>Group 8: Gene transcription</b>       |                      |                     |          |          |        |                    |        |               |       |               |        |        |
| ZNF38                                    | 4                    | 0.0085              | 11550034 | G        | 18.1   | 102                | -1.986 | 0.0470        |       |               |        |        |
|                                          |                      |                     |          | A        | 81.9   |                    | 1.986  |               |       |               |        |        |
| <b>Group 10: Cell adhesion molecules</b> |                      |                     |          |          |        |                    |        |               |       |               |        |        |
| ITGB2                                    | 33                   | 0.0012              | 2070947  | G        | 34.5   | 129                | -2.031 | 0.0423        |       |               |        |        |
|                                          |                      |                     |          | A        | 65.5   |                    | 2.031  |               |       |               |        |        |
|                                          |                      |                     |          | G        | 34.5   | 108                | -2.050 |               |       |               | 0.0404 |        |
|                                          |                      |                     |          |          | A      |                    | 65.5   |               |       |               |        | 2.050  |

| Gene                                   | Number of tested SNP | Corrected threshold | SNP      | Allele | AF     | Number of families | Z      | p value       |       |               |
|----------------------------------------|----------------------|---------------------|----------|--------|--------|--------------------|--------|---------------|-------|---------------|
|                                        |                      |                     |          |        |        |                    |        | Asthma        | Atopy | Atopic asthma |
| <b>Group 11: Complement components</b> |                      |                     |          |        |        |                    |        |               |       |               |
| <i>C7</i>                              | 35                   | 0.0014              | 13175903 | G      | 24.1   | 123                | -2.745 | 0.0060        |       |               |
|                                        |                      |                     |          | A      | 75.9   |                    | 2.745  |               |       |               |
|                                        |                      |                     |          | G      | 24.1   | 98                 | -2.204 | 0.0275        |       |               |
|                                        |                      |                     |          | A      | 75.9   |                    | 2.204  |               |       |               |
|                                        |                      |                     | G        | 24.1   | 97     | -2.407             |        |               |       |               |
|                                        |                      |                     | A        | 75.9   |        | 2.407              |        |               |       |               |
|                                        |                      |                     | 16870514 | A      | 9.6    | 53                 | 1.995  | 0.0461        |       |               |
|                                        |                      |                     |          | G      | 90.4   |                    | -1.995 |               |       |               |
| <b>Group 12: Metabolic enzymes</b>     |                      |                     |          |        |        |                    |        |               |       |               |
| <i>ALDH3A1</i>                         | 13                   | 0.0078              | 1989379  | A      | 25     | 129                | -1.965 | 0.0494        |       |               |
|                                        |                      |                     |          | G      | 75     |                    | 1.965  |               |       |               |
|                                        |                      |                     | 2228100  | C      | 23.1   | 112                | 2.032  | 0.0422        |       |               |
|                                        |                      |                     |          | G      | 76.9   |                    | -2.032 |               |       |               |
| <i>FA2H</i>                            | 14                   | 0.0024              | 12919626 | A      | 11.6   | 84                 | -2.279 | 0.0226        |       |               |
|                                        |                      |                     |          | G      | 88.4   |                    | 2.279  |               |       |               |
|                                        |                      |                     |          | A      | 11.6   | 68                 | -2.730 |               |       |               |
|                                        |                      |                     | G        | 88.4   | 2.730  |                    |        |               |       |               |
|                                        |                      |                     | 49999690 | A      | 36.6   | 109                | 2.155  | 0.0312        |       |               |
|                                        |                      |                     |          | G      | 63.4   |                    | -2.155 |               |       |               |
| <i>ADH1B</i>                           | 15                   | 0.0030              | 1826909  | C      | 31.3   | 133                | 2.807  | 0.0050        |       |               |
|                                        |                      |                     |          | T      | 68.7   |                    | -2.807 |               |       |               |
|                                        |                      |                     |          | C      | 31.3   | 114                | 2.400  | 0.0164        |       |               |
|                                        |                      |                     |          | T      | 68.7   |                    | -2.400 |               |       |               |
|                                        |                      |                     | 13103321 | C      | 31.3   | 112                | 2.356  | 0.0185        |       |               |
|                                        |                      |                     |          | T      | 68.7   |                    | -2.356 |               |       |               |
|                                        |                      |                     | 1353621  | T      | 47.7   | 135                | -3.040 | <b>0.0024</b> |       |               |
|                                        |                      |                     |          | G      | 52.3   |                    | 3.040  |               |       |               |
|                                        |                      |                     |          | T      | 47.7   | 114                | -2.566 | 0.0103        |       |               |
|                                        |                      |                     |          | G      | 52.3   |                    | 2.566  |               |       |               |
|                                        |                      |                     | 1159918  | T      | 47.7   | 114                | -2.621 | 0.0088        |       |               |
|                                        |                      |                     |          | G      | 52.3   |                    | 2.621  |               |       |               |
|                                        |                      |                     | 1353621  | C      | 47.3   | 136                | -2.848 | 0.0044        |       |               |
|                                        |                      |                     |          | T      | 52.7   |                    | 2.848  |               |       |               |
| C                                      | 47.3                 | 116                 |          | -2.436 | 0.0149 |                    |        |               |       |               |
| T                                      | 52.7                 |                     |          | 2.436  |        |                    |        |               |       |               |
| 1159918                                | C                    | 47.3                |          | 115    | -2.403 | 0.0063             |        |               |       |               |
|                                        | T                    | 52.7                |          |        | 2.403  |                    |        |               |       |               |
| 1159918                                | A                    | 32.3                | 126      | 2.329  | 0.0199 |                    |        |               |       |               |
|                                        | C                    | 67.7                |          | -2.329 |        |                    |        |               |       |               |
|                                        | 1159918              | A                   | 32.3     | 106    | 2.194  | 0.0282             |        |               |       |               |
|                                        |                      | C                   | 67.7     |        | -2.194 |                    |        |               |       |               |



| Gene                                 | Number of tested SNP | Corrected threshold | SNP     | Allele | AF   | Number of families | Z      | p value |       |               |
|--------------------------------------|----------------------|---------------------|---------|--------|------|--------------------|--------|---------|-------|---------------|
|                                      |                      |                     |         |        |      |                    |        | Asthma  | Atopy | Atopic asthma |
| <i>PIK3R1</i>                        | 4                    | 0.0065              | 34306   | A      | 31.3 | 82                 | -2.154 | 0.0313  |       |               |
|                                      |                      |                     |         | G      | 68.7 |                    | 2.154  |         |       |               |
|                                      |                      |                     |         | A      | 31.3 | 81                 | -2.021 | 0.0433  |       |               |
|                                      |                      |                     |         | G      | 68.7 |                    | 2.021  |         |       |               |
| <b>Group 13: Structural proteins</b> |                      |                     |         |        |      |                    |        |         |       |               |
| <i>TENASCIN C</i>                    | 36                   | 0.0012              | 1330368 | G      | 45.3 | 134                | 2.019  | 0.0435  |       |               |
|                                      |                      |                     |         | A      | 54.7 |                    | -2.019 |         |       |               |
|                                      |                      |                     | 1060545 | C      | 45.1 | 132                | 2.020  | 0.0434  |       |               |
|                                      |                      |                     |         | A      | 54.9 |                    | -2.020 |         |       |               |
|                                      |                      |                     | 1757095 | T      | 8.5  | 48                 | 2.157  | 0.0310  |       |               |
|                                      |                      |                     |         | C      | 91.5 |                    | -2.157 |         |       |               |

Abbreviations : SNP = Single Nucleotide Polymorphism, AF= Minor Allele Frequency, Z= Z score
